# Supplementary material for: Pendent carboxylic acid-fuelled high-performance uranium extraction in a hydrogen-bonded framework and prolifically improved water oxidation via post-metalation-actuated composite fabrication
Source: Royal Society of Chemistry journal article supplement (doi:10.1039/d3ta06790d), 2024-01-01
Supplement: d3ta06790d1.pdf [file d3ta06790d1.pdf]

## Electronic Supplementary Information

### **Pendent carboxylic acid-fuelled high-performance uranium extraction in a hydrogen-bonded framework and prolifically improved water oxidation via post-metalation-actuated composite fabrication**

Nilanjan Seal<sup>a,b,\*</sup>, Arun Karmakar<sup>a,c</sup>, Subrata Kundu<sup>a,c,\*</sup>, Subhadip Neogi<sup>a,b,\*</sup>

<sup>a</sup>Academy of Scientific and Innovative Research (AcSIR), Ghaziabad- 201002, India

<sup>b</sup>Inorganic Materials & Catalysis Division, CSIR-Central Salt & Marine Chemicals Research Institute, Bhavnagar, Gujarat 364002, India

<sup>c</sup>Electrochemical Process Engineering (EPE) Division, CSIR–Central Electrochemical Research Institute (CECRI), Karaikudi, Tamil Nadu 630003, India

\*E-mail (Nilanjan Seal): [nilanjan.seal5@gmail.com](mailto:nilanjan.seal5@gmail.com)

\*E-mail (Subrata Kundu): [skundu@cecri.res.in](mailto:skundu@cecri.res.in) and [kundu.subrata@gmail.com](mailto:kundu.subrata@gmail.com)

\*E-mail (Subhadip Neogi): [sneogi@csmcri.res.in](mailto:sneogi@csmcri.res.in) and [subhadip79@gmail.com](mailto:subhadip79@gmail.com)

### Table of contents

|     |                                                                                                                                                                                                                                                               |          |
|-----|---------------------------------------------------------------------------------------------------------------------------------------------------------------------------------------------------------------------------------------------------------------|----------|
| 1.  | Section S1. Materials and Physical measurements                                                                                                                                                                                                               | Page S2  |
| 2.  | Section S2. Single Crystal X-ray Crystallography                                                                                                                                                                                                              | Page S3  |
| 3.  | Section S3. Experimental Section                                                                                                                                                                                                                              | Page S3  |
| 4.  | <b>Fig. S1</b> (a) Asymmetric unit, (b) fish-bone shaped structure and (c) topological representation of <b>CSMCRI-21</b> .                                                                                                                                   | Page S5  |
| 5.  | <b>Fig. S2</b> PXRD pattern of the MOF (a) after immersing in some common organic solvents and (b) in diverse pH media.                                                                                                                                       | Page S6  |
| 6.  | <b>Fig. S3</b> Thermogravimetric analysis (TGA) of as-synthesized and activated <b>CSMCRI-21</b> .                                                                                                                                                            | Page S7  |
| 7.  | <b>Fig. S4</b> (a) XPS survey spectrum of <b>CSMCRI-21</b> . (b) N <sub>2</sub> adsorption-desorption isotherm of activated <b>CSMCRI-21</b> at 77 K.                                                                                                         | Page S7  |
| 8.  | <b>Fig. S5</b> UV-Vis spectra of <b>21a</b> , H <sub>3</sub> TCA and dpa (dispersed in water).                                                                                                                                                                | Page S8  |
| 9.  | <b>Fig. S6</b> The curvature of the Stern-Volmer (S–V) plot for UO <sub>2</sub> <sup>2+</sup> sensing.                                                                                                                                                        | Page S8  |
| 10. | <b>Fig. S7</b> (a) Linear region of Stern-Volmer (S–V) plot for UO <sub>2</sub> <sup>2+</sup> sensing. (b) Linear region of fluorescence intensity of <b>21a</b> upon addition of 10 μM UO <sub>2</sub> <sup>2+</sup> solution.                               | Page S9  |
| 11. | <b>Fig. S8</b> Reproducibility of quenching efficiency of <b>21a</b> towards U(VI) up to five sensing recovery cycles.                                                                                                                                        | Page S9  |
| 12. | <b>Fig. S9</b> pH dependency of U(VI) uptake by <b>21a</b> .                                                                                                                                                                                                  | Page S10 |
| 13. | <b>Fig. S10</b> (a) Uranyl adsorption by <b>21a</b> from simulated seawater. (b) U(VI) adsorption by <b>28a</b> and Ni <sup>2+</sup> @ <b>21a</b> . Emission spectra of (c) <b>28a</b> and (d) Ni <sup>2+</sup> @ <b>21a</b> upon addition of U(VI) solution. | Page S10 |
| 14. | <b>Fig. S11</b> (a) PXRD pattern of the MOF after sensing and adsorption of U(VI). (b) PL quenching of H <sub>3</sub> TCA in presence of U(VI).                                                                                                               | Page S11 |

|     |                                                                                                                                                                                    |          |
|-----|------------------------------------------------------------------------------------------------------------------------------------------------------------------------------------|----------|
| 15. | <b>Fig. S12</b> FE-SEM images of (a) <b>CSMCRI-21</b> and (b) after U(VI) sensing.                                                                                                 | Page S11 |
| 16. | <b>Fig. S13</b> FT-IR spectra of the MOF before and after adsorption of U(VI).                                                                                                     | Page S11 |
| 17. | <b>Fig. S14</b> High-resolution XPS spectrum of (a) C 1s and (b) N 1s of $\text{UO}_2^{2+}$ @ <b>21a</b> .                                                                         | Page S12 |
| 18. | <b>Fig. S15</b> PXRD patterns of $\text{Ni}^{2+}$ @ <b>21a</b> and as-synthesized <b>CSMCRI-21</b> .                                                                               | Page S12 |
| 19. | <b>Fig. S16</b> High-resolution XPS spectra of $\text{Ni}^{2+}$ @ <b>21a</b> consisting of (a) Co 2p, (b) Ni 2p, (c) C 1s, (d) N 1s and (e) O 1s.                                  | Page S13 |
| 20. | <b>Fig. S17</b> Cyclic voltammetry of <b>21a</b> revealing the oxidation process of $\text{Co}^{2+}$ to $\text{Co}^{3+}$ .                                                         | Page S14 |
| 21. | <b>Fig. S18</b> pH dependent LSV measurement for $\text{Ni}^{2+}$ @ <b>21a</b> .                                                                                                   | Page S14 |
| 22. | <b>Fig. S19</b> pH dependent electrochemical impedance spectroscopic measurement for <b>21a</b> .                                                                                  | Page S15 |
| 23. | <b>Fig. S20</b> pH dependent electrochemical impedance spectroscopic measurement for $\text{Ni}^{2+}$ @ <b>21a</b> .                                                               | Page S15 |
| 24. | <b>Fig. S21</b> Theoretical and experimental amounts of oxygen evolution for <b>21a</b> during OER electrocatalysis.                                                               | Page S16 |
| 25. | <b>Fig. S22</b> Theoretical and experimental amounts of oxygen evolution for $\text{Ni}^{2+}$ @ <b>21a</b> during OER electrocatalysis.                                            | Page S16 |
| 26. | <b>Fig. S23</b> Cyclic voltammetry plot for <b>21a</b> at various scan rates (50 mV/s to 10 mV/s) in the non-Faradaic region.                                                      | Page S17 |
| 27. | <b>Fig. S24</b> Cyclic voltammetry plot for $\text{Ni}^{2+}$ @ <b>21a</b> at various scan rates (150 mV/s to 30 mV/s) in the non-Faradaic region.                                  | Page S17 |
| 28. | <b>Fig. S25</b> Plot of capacitive current as a function of scan rate for <b>21a</b> and commercial NiO in the non-Faradaic region.                                                | Page S18 |
| 29. | <b>Fig. S26</b> PXRD pattern of the MOF after water oxidation.                                                                                                                     | Page S18 |
| 30. | <b>Fig. S27</b> FE-SEM images of the MOF (a) and after water oxidation (b).                                                                                                        | Page S18 |
| 31. | <b>Fig. S28</b> XPS survey spectrum of the MOF after water oxidation.                                                                                                              | Page S19 |
| 32. | <b>Fig. S29</b> Proposed mechanism for <b>21a</b> -catalyzed OER.                                                                                                                  | Page S19 |
| 33. | <b>Table S1.</b> Crystal data and refinement parameters for <b>CSMCRI-21</b>                                                                                                       | Page S20 |
| 34. | <b>Table S2.</b> Number of electrons and molecular mass of guest molecules associated with <b>CSMCRI-21</b> for determination of solvent composition and molecular formula         | Page S21 |
| 35. | <b>Table S3.</b> Crystal data and refinement parameters for <b>CSMCRI-28</b>                                                                                                       | Page S21 |
| 36. | <b>Table S4.</b> A comparison of quenching constant, their LOD values, of various luminescent MOFs used for detection of uranyl ion                                                | Page S22 |
| 37. | <b>Table S5.</b> A comparison of uptake capacities for uranium (VI) by diverse adsorbents                                                                                          | Page S22 |
| 38. | <b>Table S6.</b> The distribution coefficient ( $K_d$ ) values calculated for 10 ppm solutions of diverse cations at $V/m = 1000 \text{ mL g}^{-1}$                                | Page S23 |
| 39. | <b>Table S7.</b> A comparison of electrocatalytic performance of activated <b>CSMCRI-21</b> and $\text{Ni}^{2+}$ @ <b>21a</b> in water oxidation to that of contemporary materials | Page S24 |

## Section S1. Materials and Physical measurements

All the solvents and reagents were purchased from commercial sources (except H<sub>3</sub>TCA) and used without further purification. Powder X-ray diffraction (PXRD) data were collected using a PANalytical Empyrean (PIXcel 3D detector) system equipped with Cu K $\alpha$  ( $\lambda$ =1.54 Å) radiation. The Fourier Transform Infrared-spectra (IR) of the samples were recorded using the KBr pellet method on a Perkin–Elmer GX FTIR spectrometer in the region of 4000–400 cm<sup>-1</sup>. Thermogravimetric analyses (TGA) (heating rate of 10 °C/min under N<sub>2</sub> atmosphere) were performed with a NETZSCH TG 209F1 Libra system. Surface area measurement was carried out using Quantachrome Autosorb IQ instrument. Scanning Electron Microscopic (SEM) and Transmission Electron Microscopic (TEM) images were obtained with a JEOL JSM 7100F and JEOL, JEM 2100 instrument, respectively. Inductively coupled plasma-mass spectrometry (ICP-MS) analysis was measured by Perkin Elmer, Optima 2000. XPS analysis was carried out using a Thermo Scientific ESCALAB 250 Xi photoelectron spectrometer (XPS) using a monochromatic Al K $\alpha$  X-ray as an excitation source.

## Section S2. Single Crystal X-ray Crystallography

Single crystals with suitable dimensions were chosen under an optical microscope and mounted on a glass fibre for data collection. The crystal data for **CSMCRI-21** and **CSMCRI-28** were collected on a Bruker D8 Quest diffractometer, with CMOS detector in shutter less mode. The crystals were cooled to low temperature using an Oxford Cryostream liquid nitrogen cryostat. The instrument was equipped with a graphite monochromatized MoK $\alpha$  X-ray source ( $\lambda$  = 0.71073 Å), with Triumph™ X-ray source optics. Data collection and initial indexing and cell refinement were handled using APEX II software.<sup>1</sup> Frame integration, including Lorentz-polarization corrections, and final cell parameter calculations were carried out using SAINT+ software.<sup>2</sup> The data were corrected for absorption using the SADABS program.<sup>3</sup> Decay of reflection intensity was monitored by analysis of redundant frames. The structure was solved using Direct methods and difference Fourier techniques. All non-hydrogen atoms were refined anisotropically. All H atoms were placed in calculated positions using idealized geometries (riding model) and assigned fixed isotropic displacement parameters. The SHELXL-2014 package within the OLEX2 crystallographic software<sup>4</sup> was applied for structure refinement with several full-matrix least-squares/difference Fourier cycles.<sup>5</sup> The disordered guest solvent molecules in the crystal lattice were treated with solvent mask option in OLEX2 software.<sup>4</sup> The potential solvent accessible void space was calculated using the PLATON<sup>6</sup> software. The crystal and refinement data for **CSMCRI-21** and **CSMCRI-28** are listed in Table S1 and S3, respectively. Topological analysis was performed by using ToposPro software.<sup>7</sup>

## Section S3. Experimental Section

**Synthesis of the ligand.** The ligand, 4,4',4''-tricarboxytriphenylamine (H<sub>3</sub>TCA) was prepared according to literature methods.<sup>8</sup>

**Synthesis of CSMCRI-21.** A mixture of  $\text{Co}(\text{NO}_3)_2 \cdot 6\text{H}_2\text{O}$  (11.63 mg, 0.04 mmol), dpa (7.36 mg, 0.04 mmol) and  $\text{H}_3\text{TCA}$  (7.54 mg, 0.02 mmol) was dissolved in 1.5 mL of N,N-Dimethylformamide (DMF) and 1.5 mL of water in a 15 mL screw-capped vial. After that, it was heated to 100 °C for three days, and then slowly cooled down to room temperature. The orange colored, block shaped crystals were obtained; which were then filtered and thoroughly washed with DMF. Anal. Calcd. For  $[\text{Co}_3(\text{TCA})_3(\text{dpa})_3] \cdot 3\text{DMF} \cdot 7\text{H}_2\text{O}$ : C, 55.74; H, 4.36; N, 11.47. Found: C, 55.78; H, 4.39; N, 11.46.

**Synthesis of CSMCRI-28.** The synthetic procedure for **CSMCRI-28** is similar to that of **CSMCRI-21** except the fact that  $\text{H}_2\text{OBA}$  (5.16 mg, 0.02 mmol) was used instead of  $\text{H}_3\text{TCA}$ . [ $\text{H}_2\text{OBA}$  : 4,4'-Oxybis(benzoic acid)]

**Synthesis of  $\text{Ni}^{2+}$ @21a.** 50 mg of activated MOF and 20 mg of  $\text{NiCl}_2 \cdot 6\text{H}_2\text{O}$  were taken in 20 mL of methanol. The mixture was stirred at 50 °C for 2 h, followed by filtration and thorough washing with methanol. Finally, the obtained derived material was dried at 60 °C for 4 h to get  $\text{Ni}^{2+}$ @21a, which was further characterized and used in performing reaction.

**Preparation of working electrode using 21a and  $\text{Ni}^{2+}$ @21a.** Within a mixture of 50  $\mu\text{L}$  Nafion solution, 200  $\mu\text{L}$  ethanol and 750  $\mu\text{L}$  of distilled water, 3 mg of respective catalysts were added. After sonication for 15 min, 34.5  $\mu\text{L}$  of this catalyst ink solution was drop-casted over the carbon, which was pre-treated with ethanol-acetone mixture.  $\text{Hg}/\text{HgO}$  was used as a reference electrode and carbon cloth was used as a counter electrode. The loading of each catalyst was around 0.1045  $\text{mg}/\text{cm}^2$ .

**Preparation of simulated seawater.** Simulated seawater was prepared following a reported procedure.<sup>9</sup> 25.6 g of NaCl, 193 mg of  $\text{NaHCO}_3$  and 17 mg of  $\text{UO}_2(\text{NO}_3)_2 \cdot 6\text{H}_2\text{O}$  were dissolved in 1.0 L of deionized water.

**Luminescence titration procedure.** Finely ground 21a (2 mg) was dispersed in 2 mL of uranyl solution with varying concentrations (3, 5, 10, 20, 50, 100, 200, 300 and 400 ppm). The mixtures were sonicated and emission spectra were collected. The probe was excited at 340 nm and emission data collection range was set from 350 to 650 nm. The regenerated MOF was collected via centrifugation, washed thoroughly with water/DCM and dried. Further characterizations and experiments were conducted using the recovered material.

**Uranium adsorption kinetics experiment.** To perform adsorption kinetics, 10 mg of 21a was dipped into 10 mL of uranium nitrate solution (solid/liquid ratio = 1g/L) with uranium concentration of 10 ppm. After stirring the mixture for certain time (1, 5, 10, 20, 30, 60, 120, 180, 240, 300, 360, 480, and 600 min), the sampling solutions were centrifuged to separate the adsorbent and uranium concentration was determined by inductively coupled plasma-mass spectrometry (ICP-MS).

**Uranium adsorption isotherm experiment.** To perform adsorption isotherm experiments, 10 mg of 21a was dipped into 10 mL aqueous solutions (solid/liquid ratio = 1g/L) containing different concentrations of uranium (10, 20, 50, 100, 200, 300 and 400 ppm). The mixtures were then stirred for 10 h and the resulting solutions were centrifuged to separate the adsorbent and concentrations of uranium were measured by ICP-MS.

**Adsorption selectivity experiment.** To investigate the adsorption selectivity of **21a** towards  $\text{UO}_2^{2+}$ , additional experiments using a series of competing metal ions ( $\text{Na}^+$ ,  $\text{K}^+$ ,  $\text{Ca}^{2+}$ ,  $\text{Ni}^{2+}$ ,  $\text{Cu}^{2+}$ ,  $\text{Zn}^{2+}$ ,  $\text{Cd}^{2+}$  and  $\text{Sr}^{2+}$ ) (chloride salts) were carried out. In these selective adsorption experiments, concentration of all metal ions was kept 10 ppm and 10 mg of adsorbent was used at pH 5. After stirring for 10 h, the resulting solutions were centrifuged and metal ion concentrations were determined by ICP-MS.

**Desorption experiment.** Uranium loaded MOF ( $\text{UO}_2^{2+}$ @**21a**) was regenerated using 0.1 M  $\text{Na}_2\text{CO}_3$  solution. The material was collected by centrifugation and washed thoroughly with deionized water followed by dichloromethane and dried. The regenerated MOF was used for next cycle of experiments and further characterization.

### Uranium uptake study and related equations.

Removal percentage of  $\text{UO}_2^{2+}$ :

$$R (\%) = \frac{C_0 - C_t}{C_0} \times 100$$

$C_0$  is the initial concentration (mg/L) and  $C_t$  is the concentration at a specific time  $t$  (mg/L).

Adsorption capacity at particular time  $t$  ( $q_t$ ) (mg/g) is defined as

$$q_t = (C_0 - C_t) \times V/m$$

$V$  is the volume of solution (L) and  $m$  is the mass of adsorbent (g).

The experimental adsorption kinetic data are fitted by either pseudo-second order or pseudo-first order model, which are mentioned below:

Pseudo-first order kinetic model:  $\ln(q_e - q_t) = \ln q_e - k_1 t$

$q_e$  and  $q_t$  are the amount of uranium adsorbed at equilibrium and at time  $t$ , respectively.  $t$  is the time for adsorption and  $k_1$  is the pseudo-first order rate constant ( $\text{min}^{-1}$ ).

Pseudo-second order kinetic model:  $\frac{t}{q_t} = \frac{1}{k_2 q_e^2} + \frac{t}{q_e}$

$k_2$  is the pseudo-second order rate constant ( $\text{g mg}^{-1} \text{min}^{-1}$ ).

Langmuir model of adsorption isotherm:  $q_e = \frac{q_m c_e}{K_L + c_e}$

$q_m$  is the maximum adsorption capacity (mg/g) and  $K_L$  is the Langmuir constant (L/mg).

Freundlich model of adsorption isotherm:  $q_e = K_F c_e^{1/n}$

$K_F$  is the Freundlich constant denoting adsorption capacity and  $n$  represents adsorption intensity.

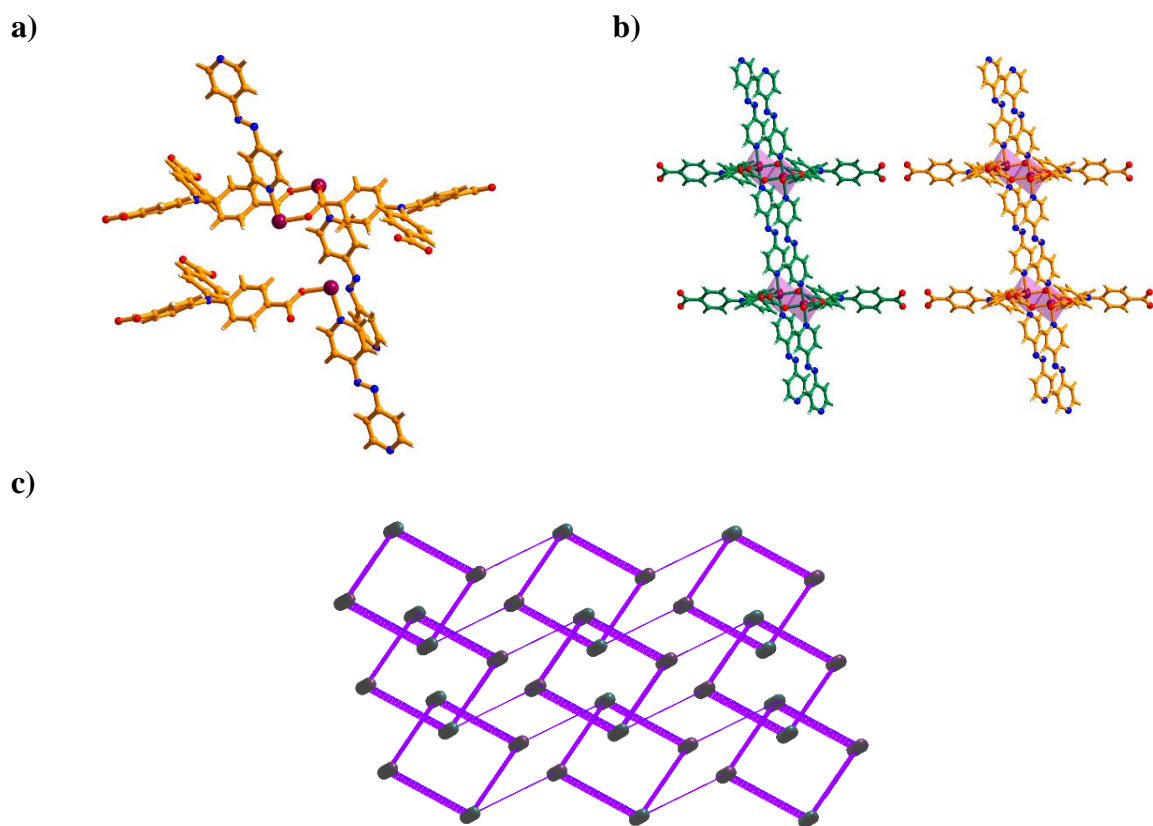

**Fig. S1** (a) Asymmetric unit, (b) fish-bone shaped structure and (c) topological representation of CSMCRI-21.

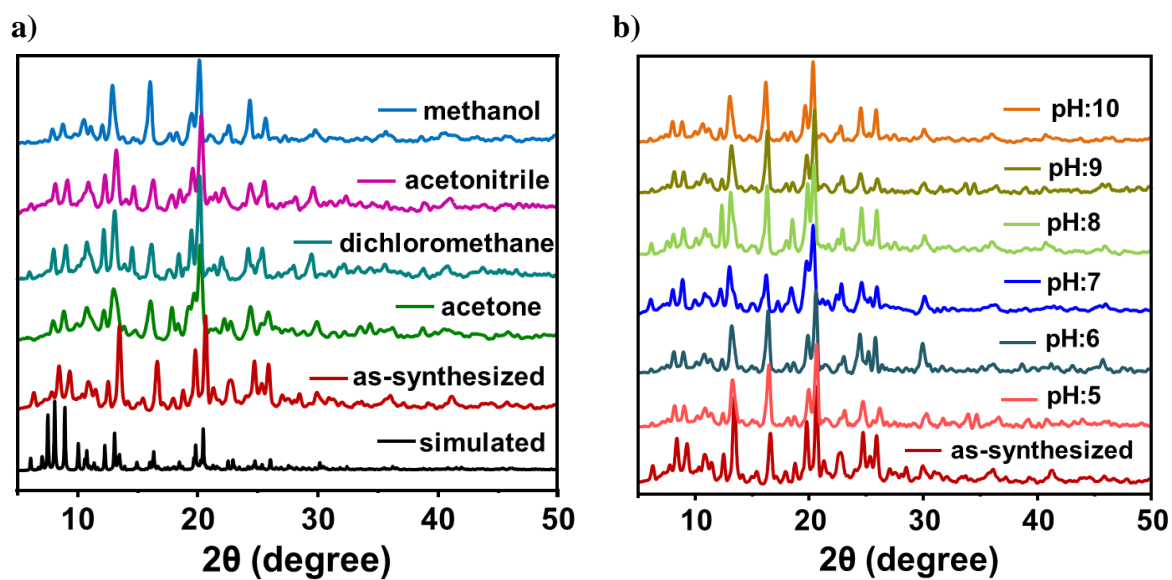

**Fig. S2** PXRD pattern of the MOF (a) after immersing in some common organic solvents and (b) in diverse pH media.

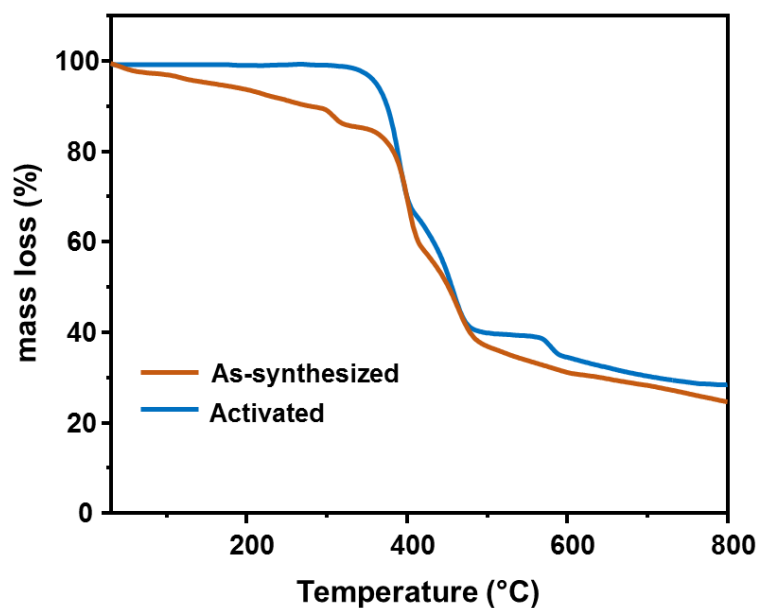

**Fig. S3** Thermogravimetric analysis (TGA) of as-synthesized and activated **CSMCRI-21**.

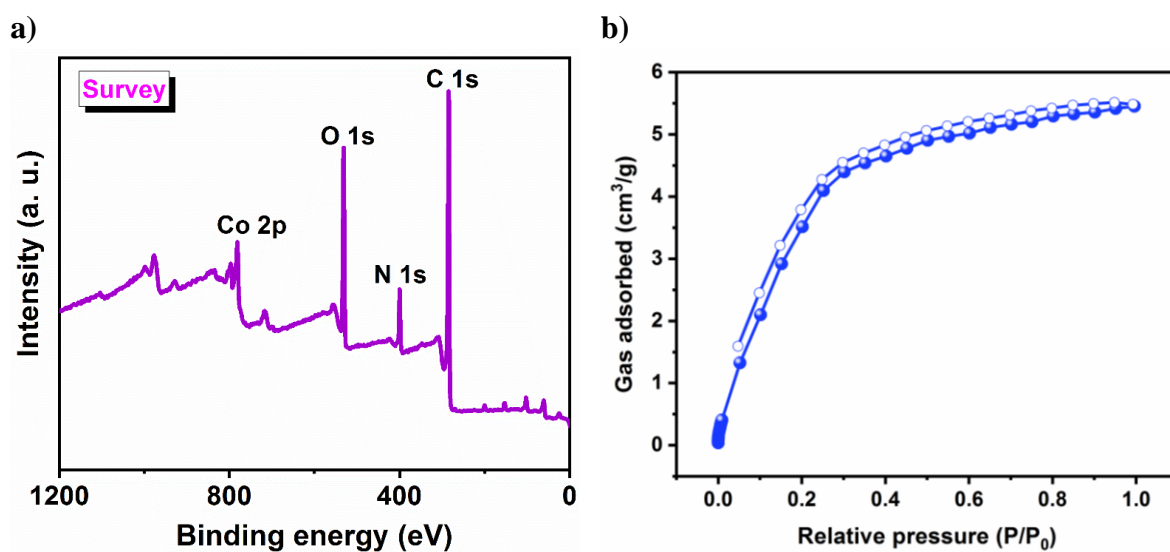

**Fig. S4** (a) XPS survey spectrum of **CSMCRI-21**. (b) N<sub>2</sub> adsorption-desorption isotherm of activated **CSMCRI-21** at 77 K.

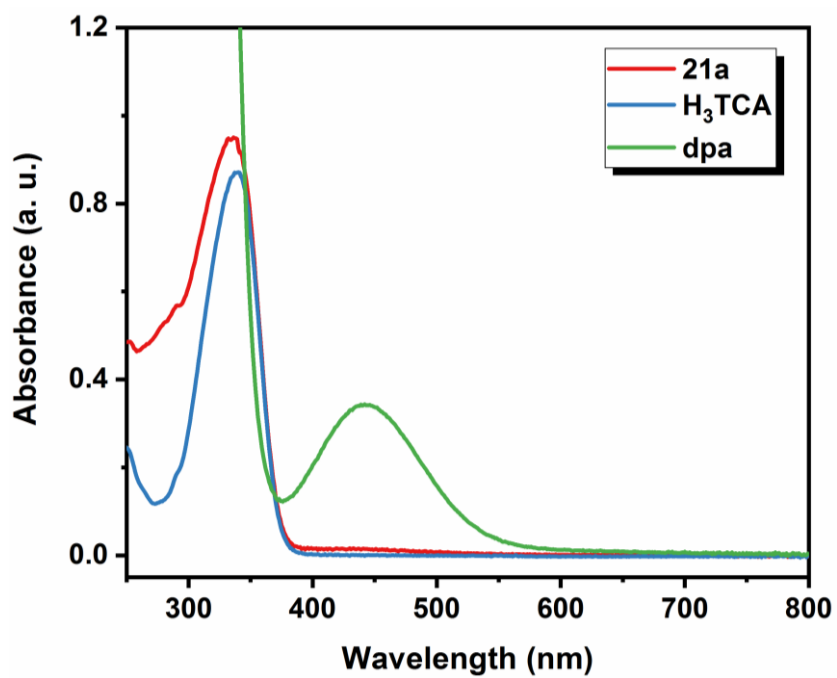

**Fig. S5** UV-Vis spectra of **21a**, H<sub>3</sub>TCA and dpa (dispersed in water).

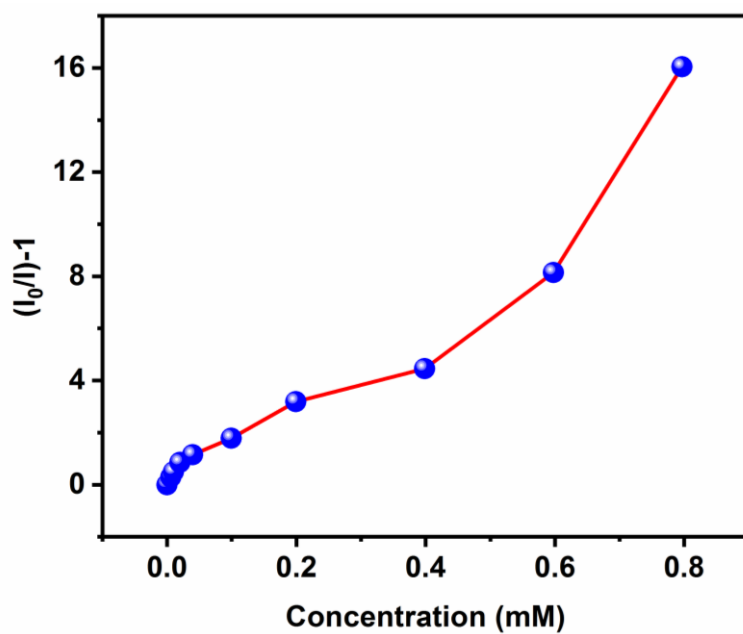

**Fig. S6** The curvature of the Stern-Volmer (S-V) plot for UO<sub>2</sub><sup>2+</sup> sensing.



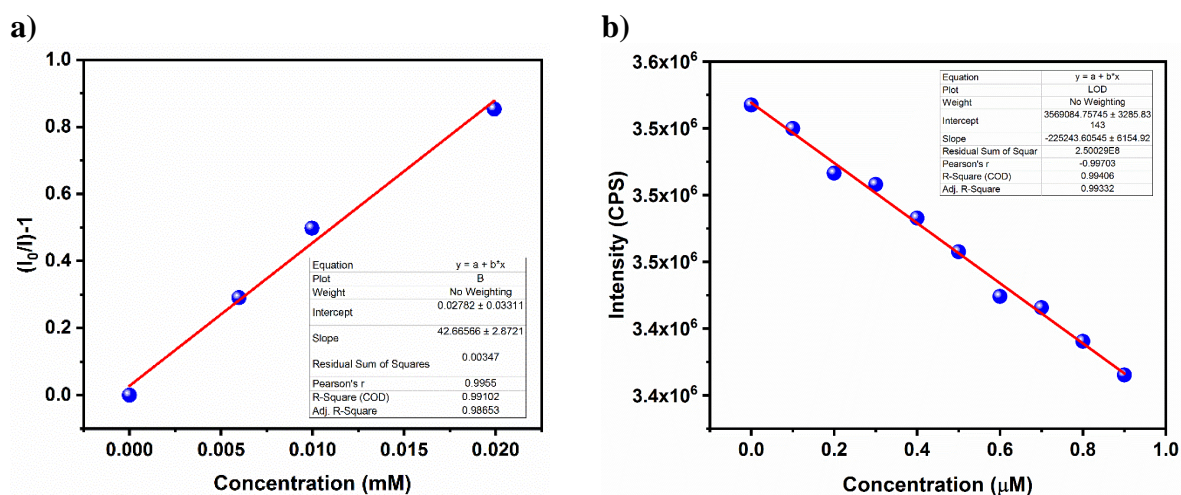

**Fig. S7** (a) Linear region of Stern-Volmer (S-V) plot for  $\text{UO}_2^{2+}$  sensing. (b) Linear region of fluorescence intensity of **21a** upon addition of  $10 \mu\text{M}$   $\text{UO}_2^{2+}$  solution.

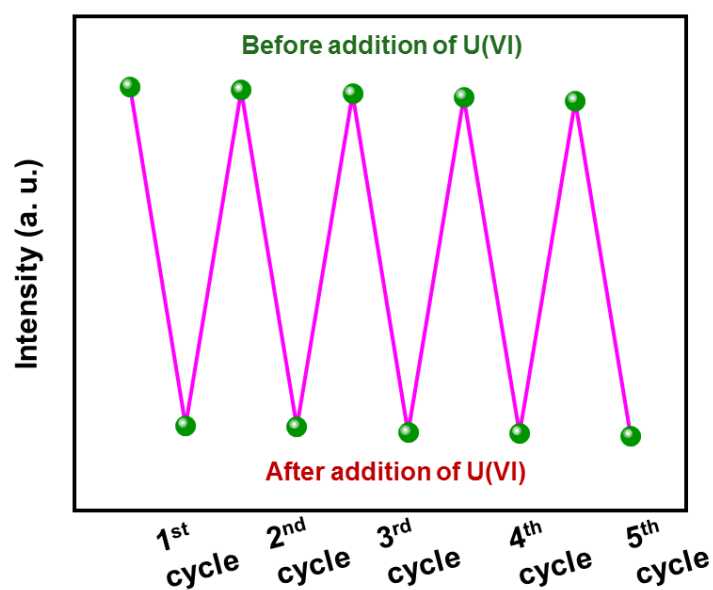

**Fig. S8** Reproducibility of quenching efficiency of **21a** towards U(VI) up to five sensing recovery cycles.

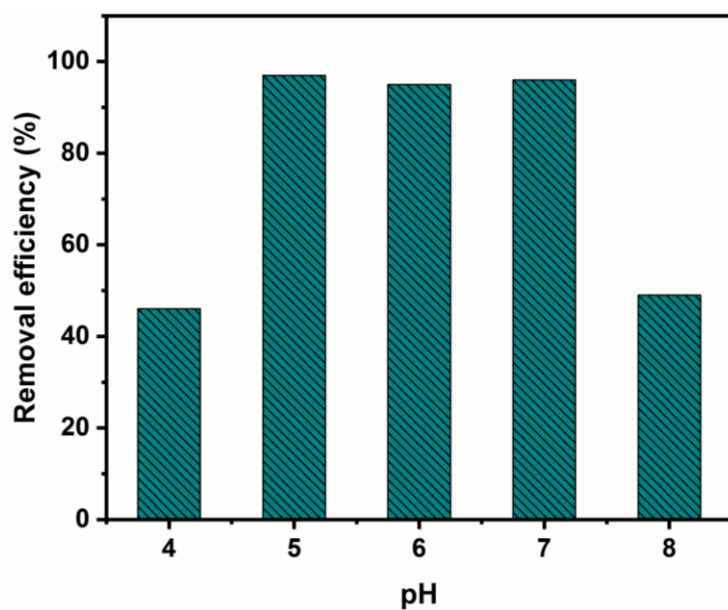

**Fig. S9** pH dependency of U(VI) uptake by **21a**.

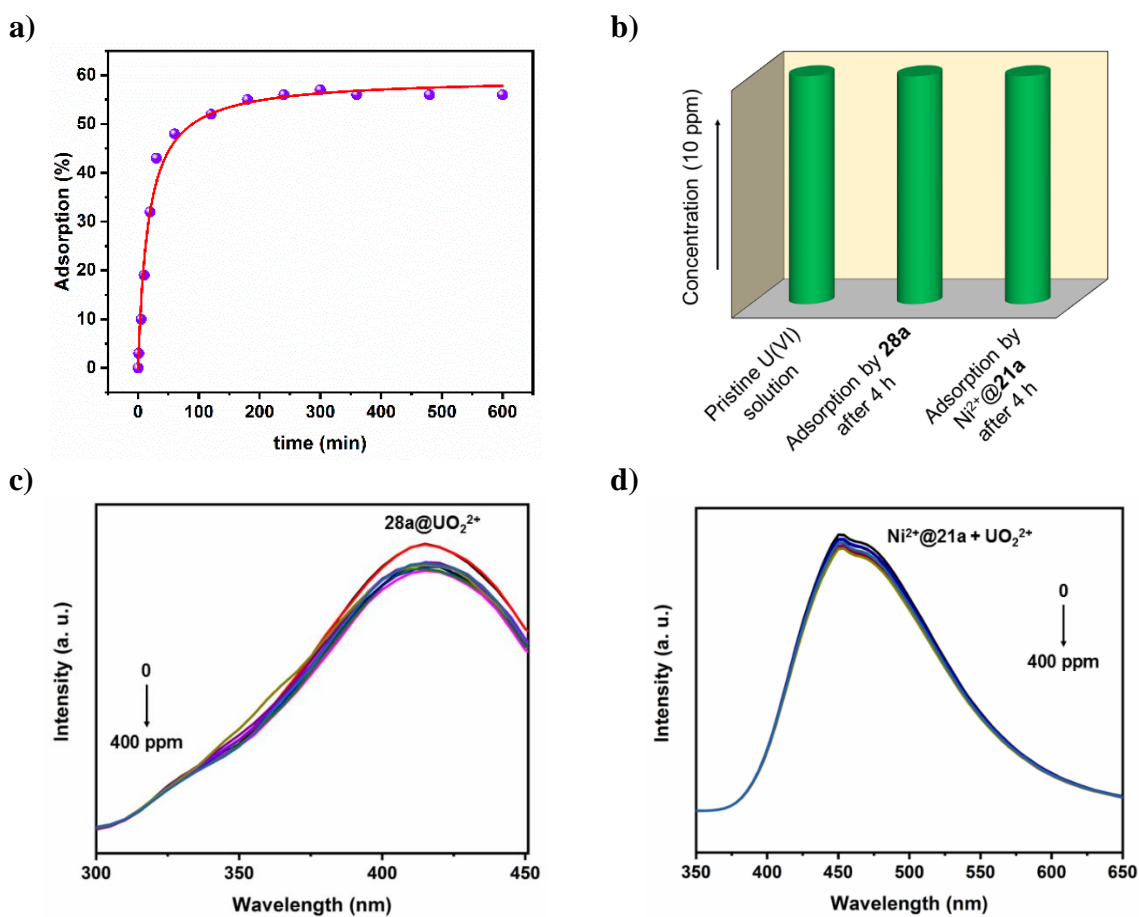

**Fig. S10** (a) Uranyl adsorption by **21a** from simulated seawater. (b) U(VI) adsorption by **28a** and  $\text{Ni}^{2+}@\mathbf{21a}$ . Emission spectra of (c) **28a** and (d)  $\text{Ni}^{2+}@\mathbf{21a}$  upon addition of U(VI) solution.

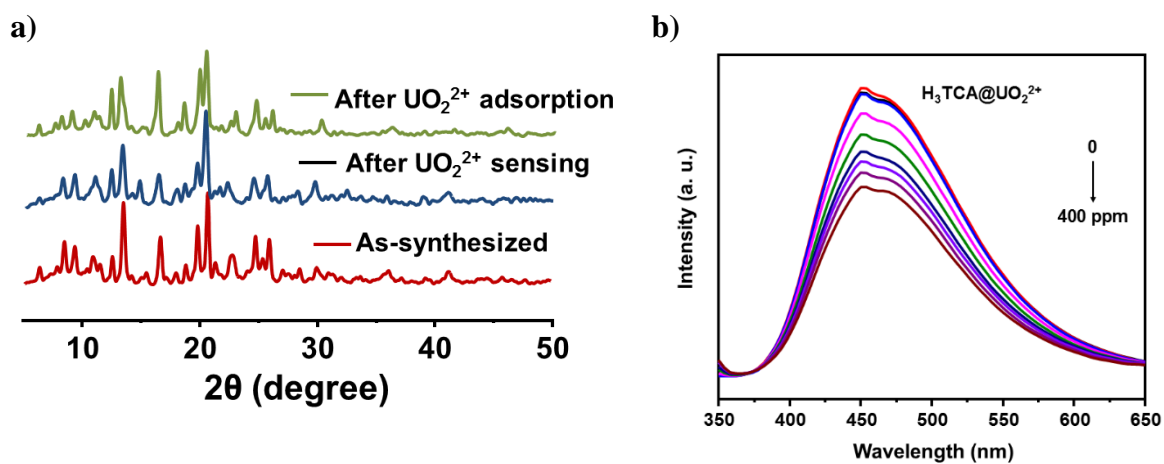

**Fig. S11** (a) PXRD pattern of the MOF after sensing and adsorption of U(VI). (b) PL quenching of  $\text{H}_3\text{TCA}$  in presence of U(VI).

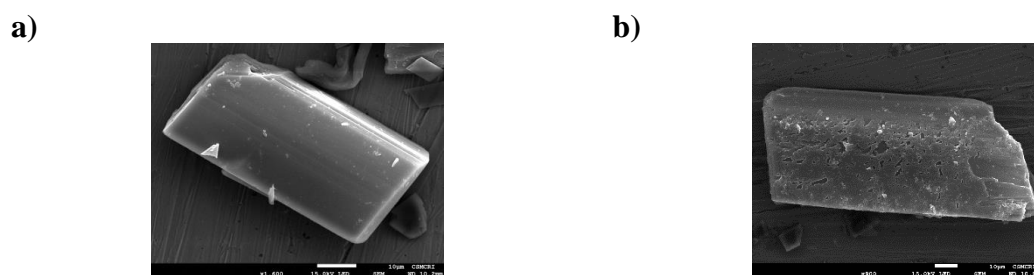

**Fig. S12** FE-SEM images of (a) **CSMCRI-21** and (b) after U(VI) sensing.

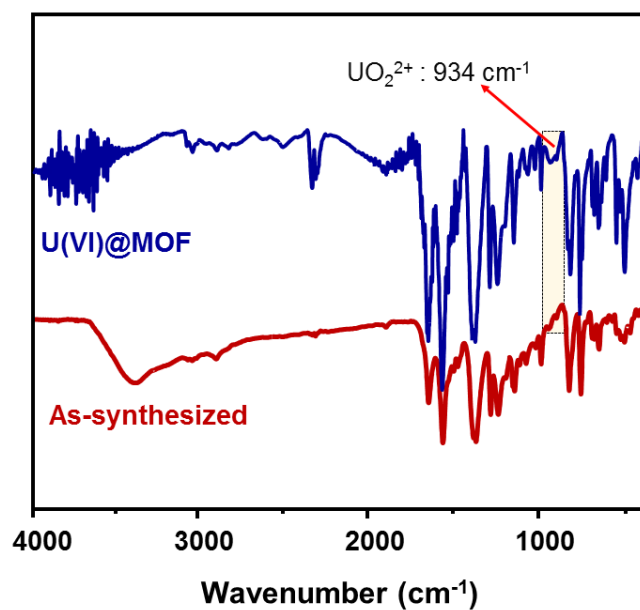

**Fig. S13** FT-IR spectra of the MOF before and after adsorption of U(VI).

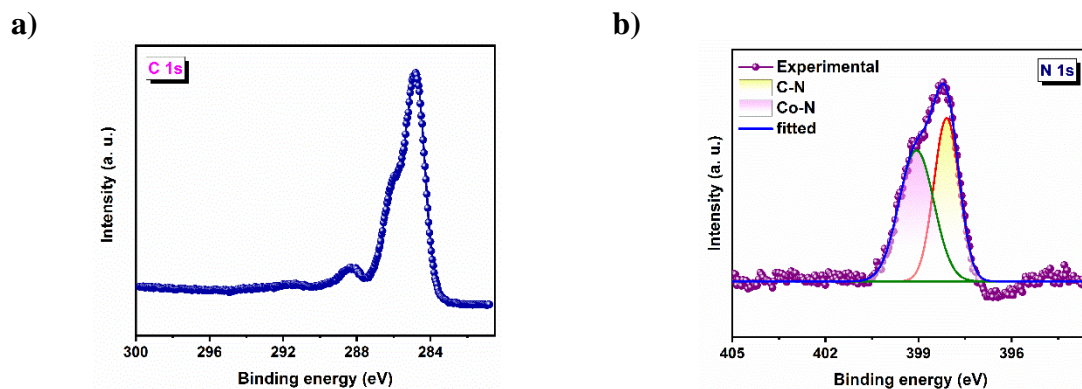

**Fig. S14** High-resolution XPS spectrum of (a) C 1s and (b) N 1s of  $\text{UO}_2^{2+}@21\text{a}$ .

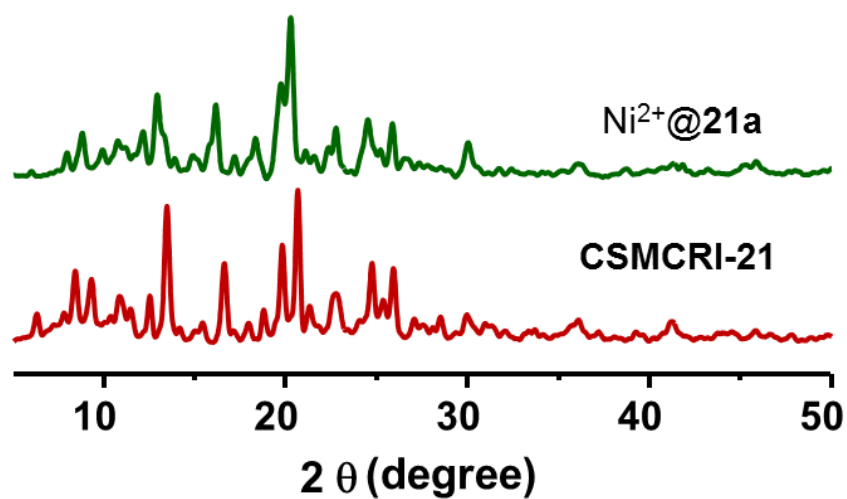

**Fig. S15** PXRD patterns of  $\text{Ni}^{2+}@21\text{a}$  and as-synthesized CSMCRI-21.

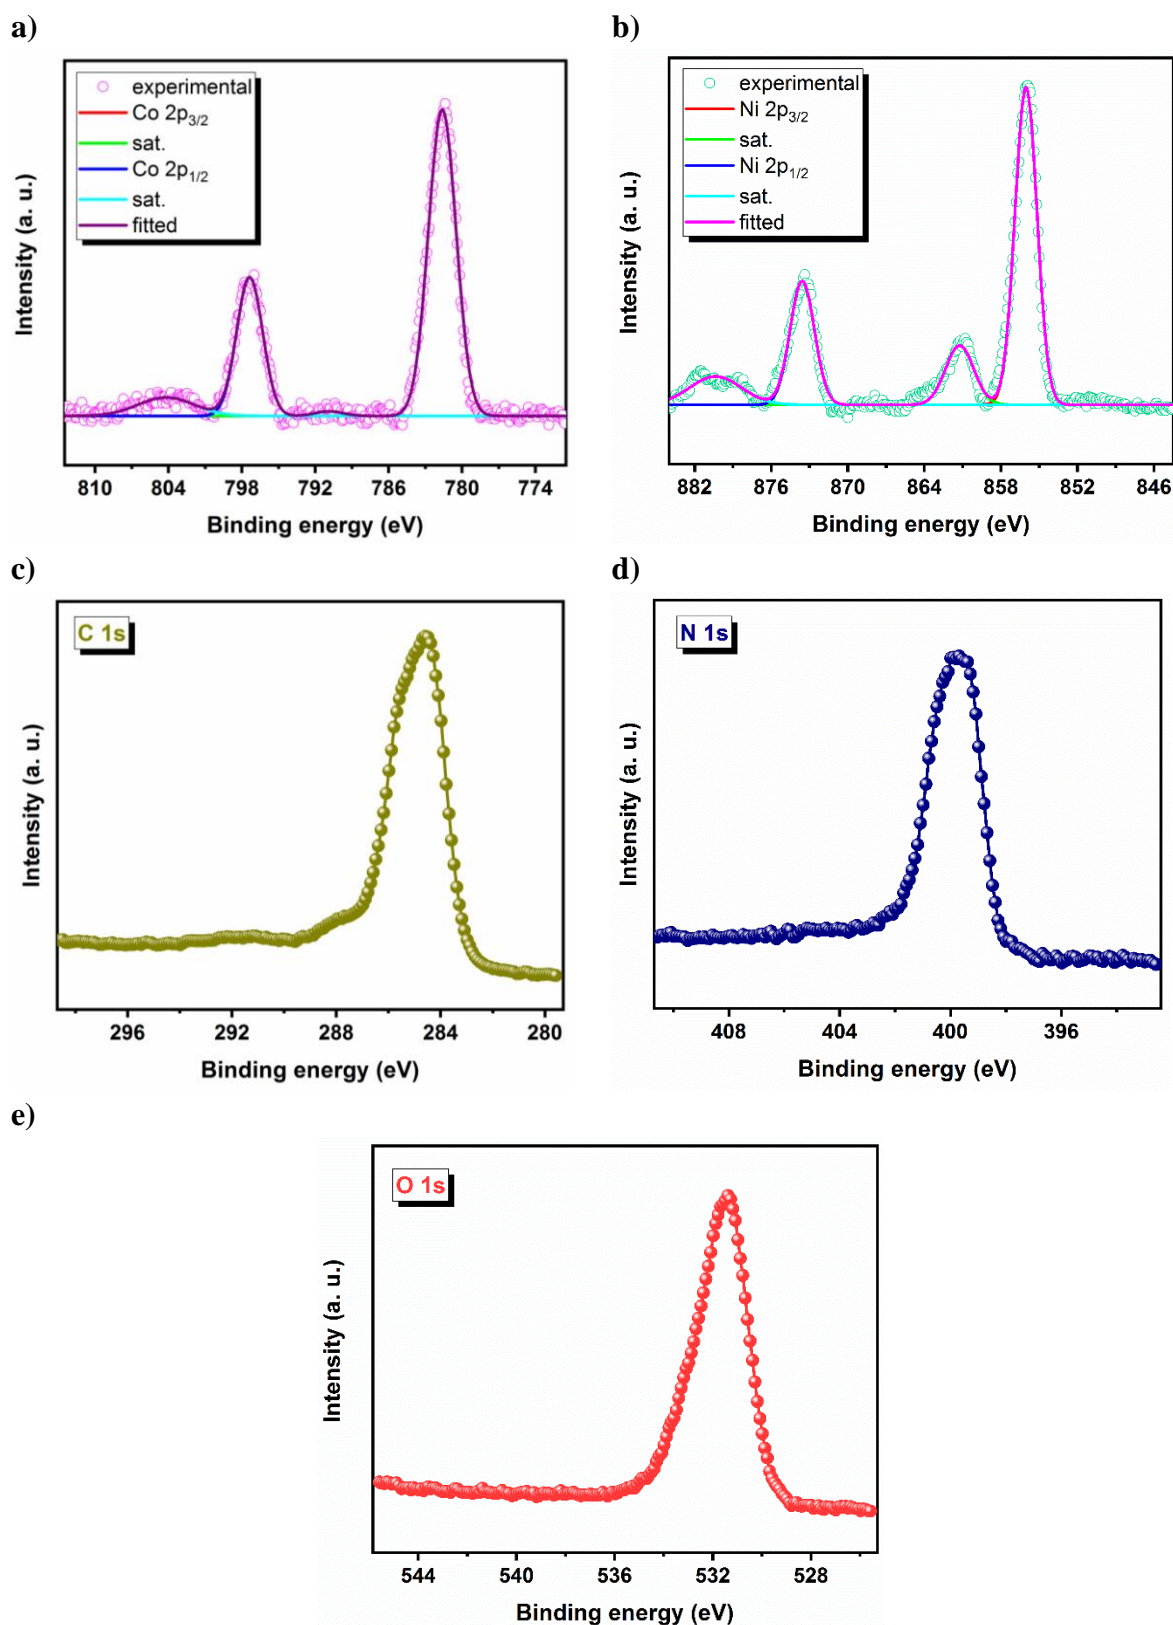

**Fig. S16** High-resolution XPS spectra of  $\text{Ni}^{2+}@21\mathbf{a}$  consisting of (a) Co 2p, (b) Ni 2p, (c) C 1s, (d) N 1s and (e) O 1s.

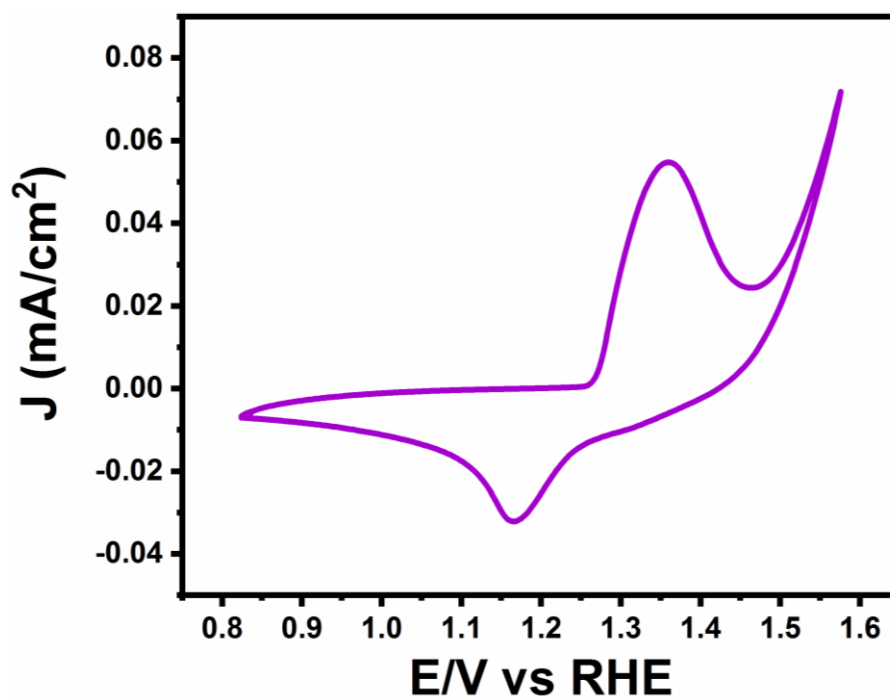

**Fig. S17** Cyclic voltammetry of **21a** revealing the oxidation process of  $\text{Co}^{2+}$  to  $\text{Co}^{3+}$ .

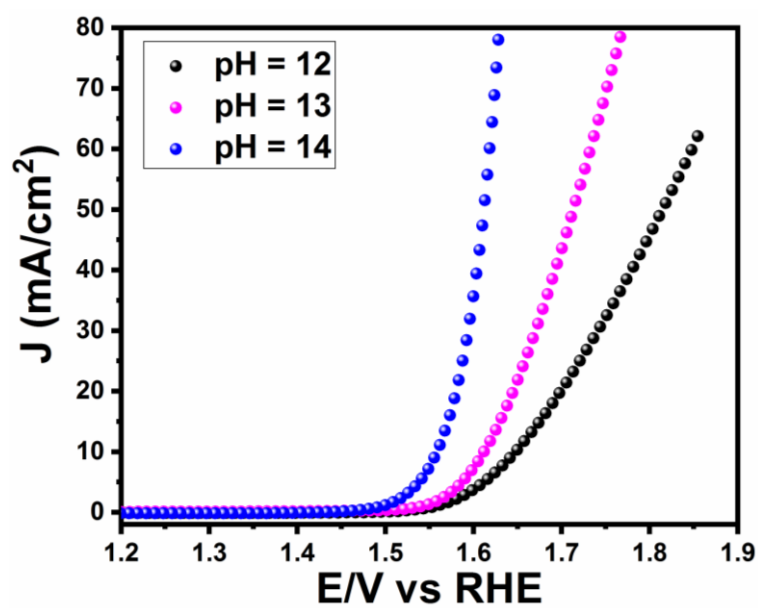

**Fig. S18** pH dependent LSV measurement for  $\text{Ni}^{2+}$ @**21a**.



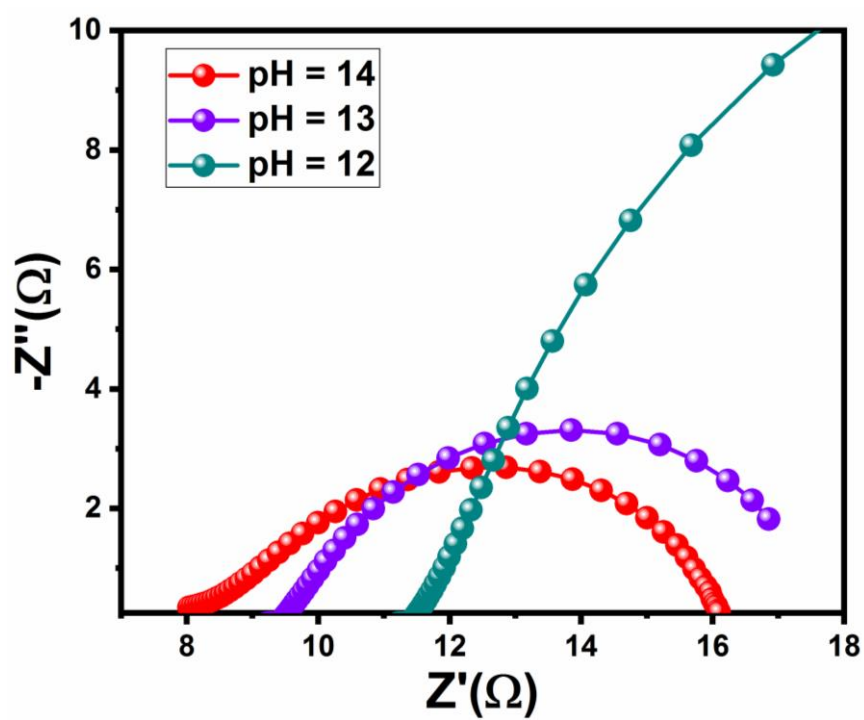

**Fig. S19** pH dependent electrochemical impedance spectroscopic measurement for **21a**.

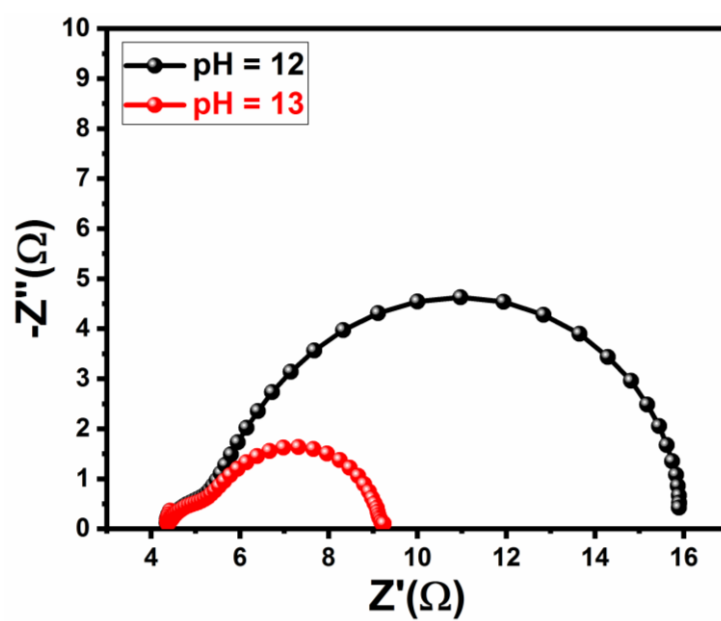

**Fig. S20** pH dependent electrochemical impedance spectroscopic measurement for  $\text{Ni}^{2+}$ @**21a**.

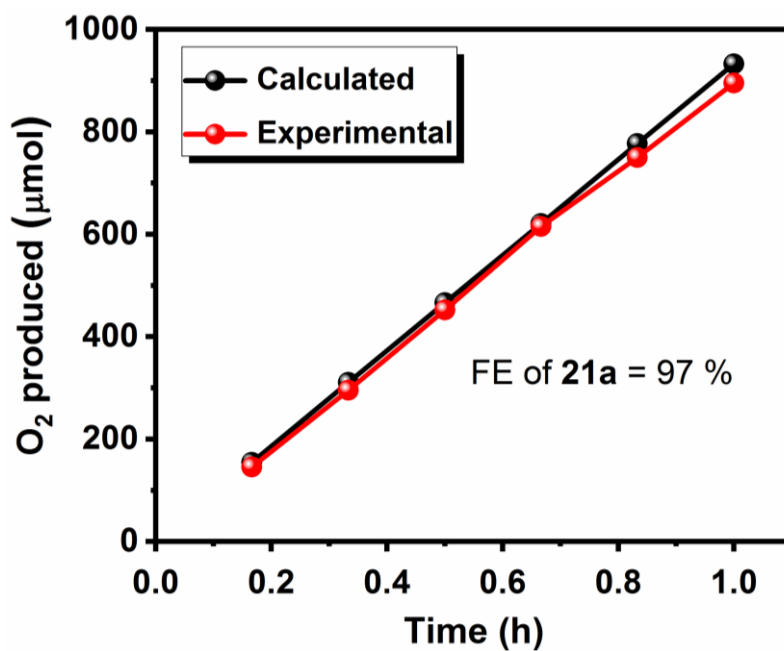

**Fig. S21** Theoretical and experimental amounts of oxygen evolution for **21a** during OER electrocatalysis.

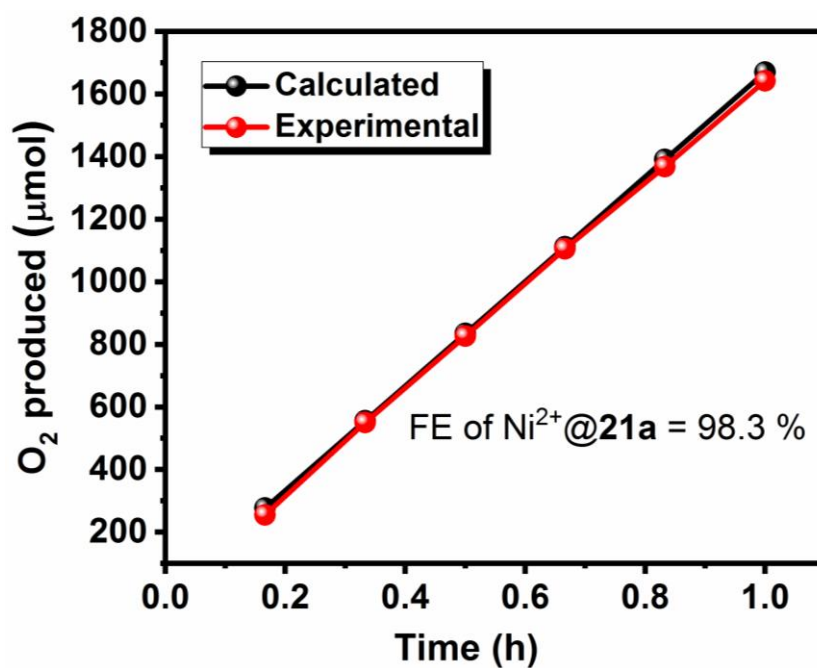

**Fig. S22** Theoretical and experimental amounts of oxygen evolution for Ni<sup>2+</sup>**21a** during OER electrocatalysis.



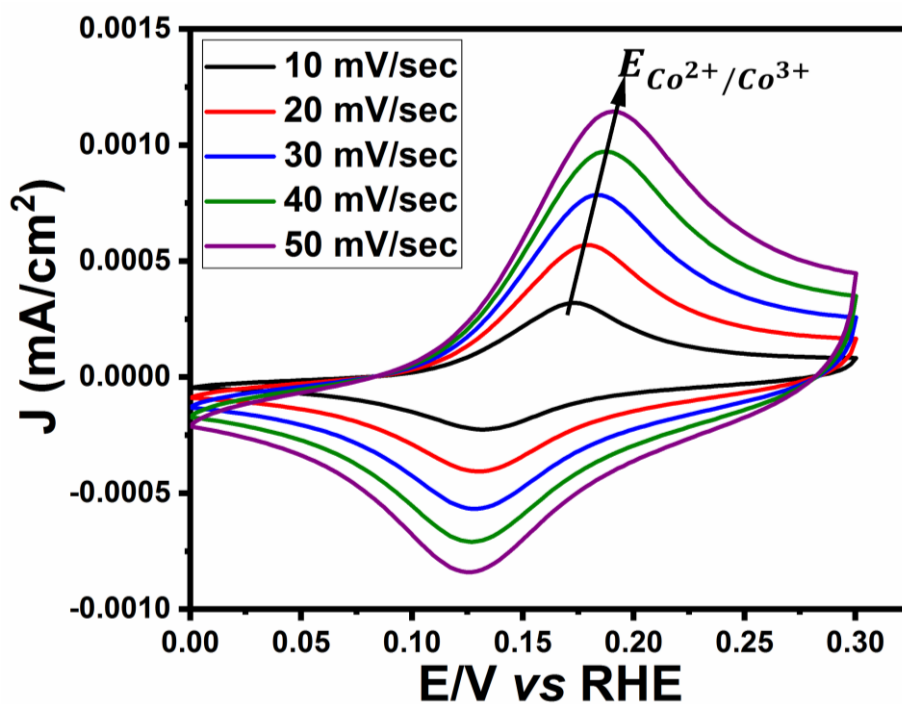

**Fig. S23** Cyclic voltammety plot for **21a** at various scan rates (50 mV/s to 10 mV/s) in the non-Faradaic region.

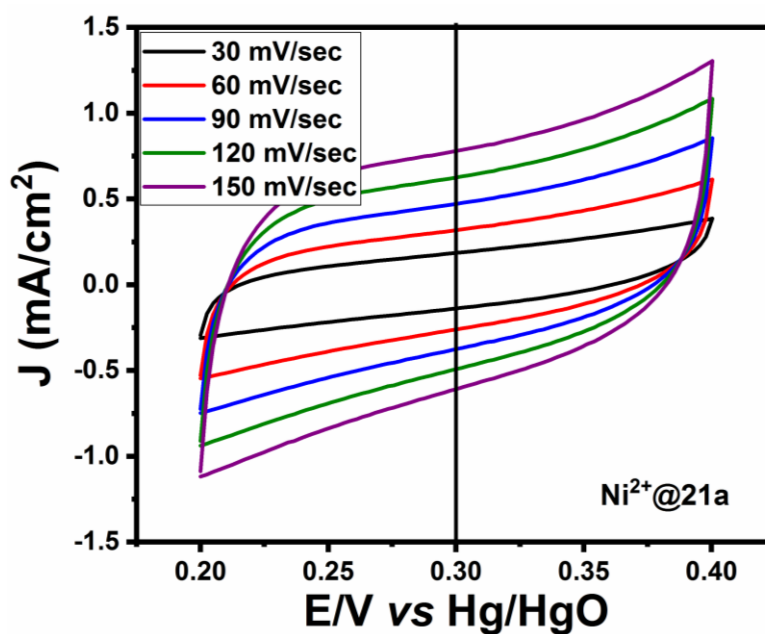

**Fig. S24** Cyclic voltammety plot for  $\text{Ni}^{2+}$ @**21a** at various scan rates (150 mV/s to 30 mV/s) in the non-Faradaic region.

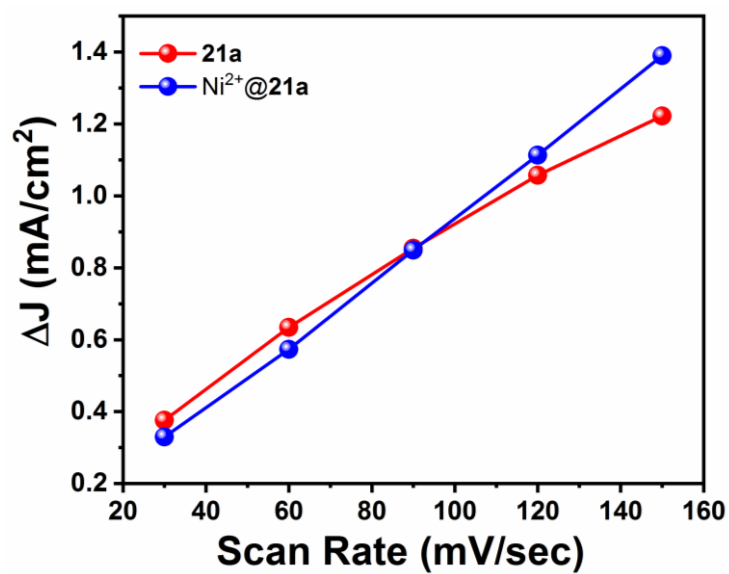

**Fig. S25** Plot of capacitive current as a function of scan rate for **21a** and commercial NiO in the non-Faradaic region.

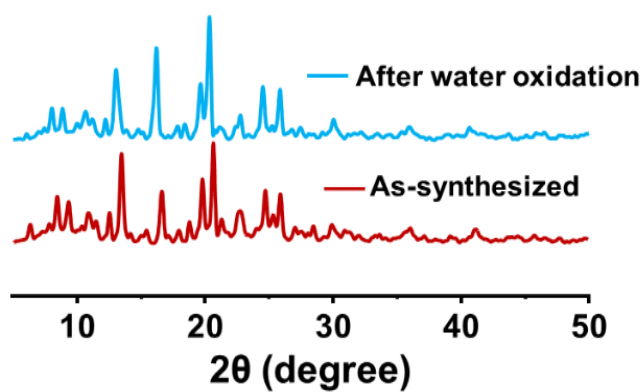

**Fig. S26** PXRD pattern of the MOF after water oxidation.

a)

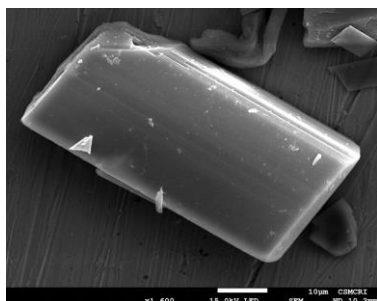

b)

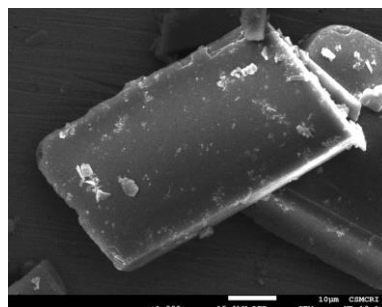

**Fig. S27** FE-SEM images of the MOF before (a) and after (b) water oxidation.

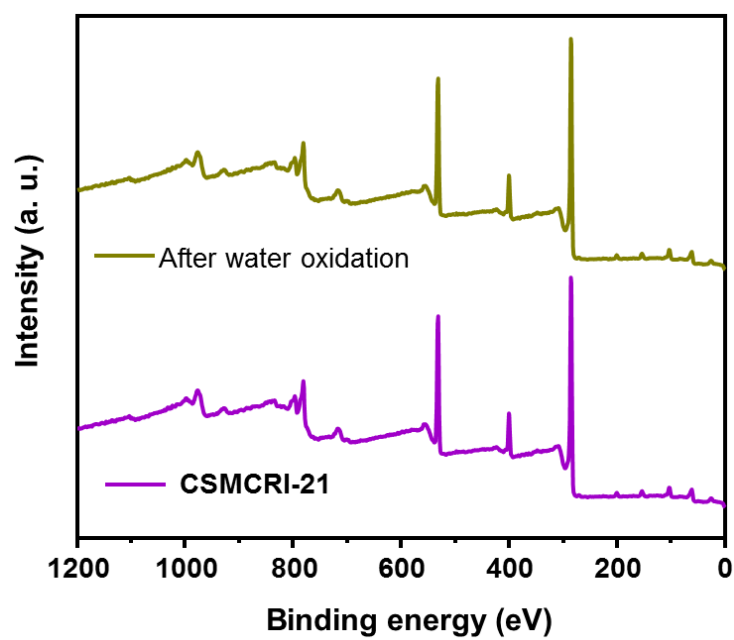

**Fig. S28** XPS survey spectrum of the MOF after water oxidation.

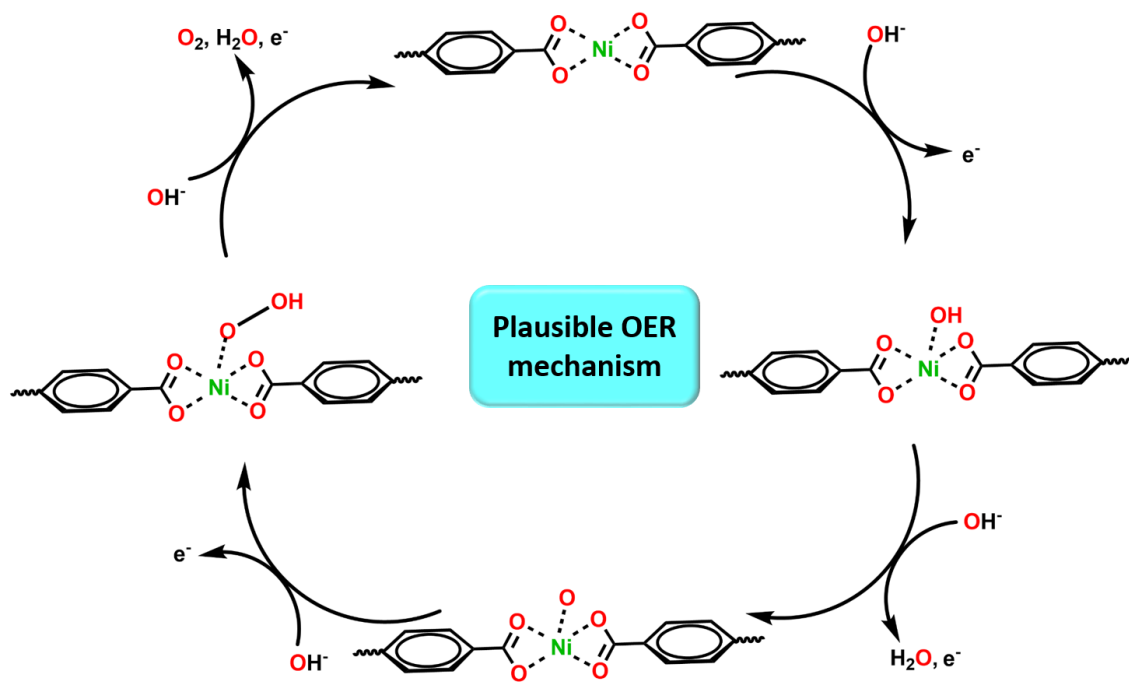

**Fig. S29** Proposed mechanism for  $\text{Ni}^{2+}@21\text{a}$ -catalyzed OER.

**Table S1.** Crystal data and refinement parameters for **CSMCRI-21**

|                                                              |                                                                                 |
|--------------------------------------------------------------|---------------------------------------------------------------------------------|
| Identification code                                          | <b>CSMCRI-21</b>                                                                |
| Empirical formula                                            | C <sub>93</sub> H <sub>60</sub> Co <sub>3</sub> N <sub>15</sub> O <sub>18</sub> |
| Formula weight                                               | 1852.40                                                                         |
| Temperature/K                                                | 302.15                                                                          |
| Crystal system                                               | triclinic                                                                       |
| Space group                                                  | <i>P</i> -1                                                                     |
| <i>a</i> /Å                                                  | 13.3607(9)                                                                      |
| <i>b</i> /Å                                                  | 14.7831(9)                                                                      |
| <i>c</i> /Å                                                  | 25.4340(18)                                                                     |
| $\alpha$ /°                                                  | 97.603(2)                                                                       |
| $\beta$ /°                                                   | 97.392(2)                                                                       |
| $\gamma$ /°                                                  | 100.151(2)                                                                      |
| Volume/Å <sup>3</sup>                                        | 4841.6(6)                                                                       |
| <i>Z</i>                                                     | 2                                                                               |
| $\rho_{\text{calc}}$ /g/cm <sup>3</sup>                      | 1.2705                                                                          |
| $\mu$ /mm <sup>-1</sup>                                      | 0.579                                                                           |
| <i>F</i> (000)                                               | 1899.0                                                                          |
| Crystal size/mm <sup>3</sup>                                 | 0.467 × 0.19 × 0.08                                                             |
| Radiation                                                    | Mo K $\alpha$ ( $\lambda$ = 0.71073)                                            |
| 2 $\theta$ range for data collection/°                       | 4.58 to 56.74                                                                   |
| Index ranges                                                 | -17 ≤ <i>h</i> ≤ 17, -19 ≤ <i>k</i> ≤ 19, -33 ≤ <i>l</i> ≤ 33                   |
| Reflections collected                                        | 137213                                                                          |
| Independent reflections                                      | 24065 [ <i>R</i> <sub>int</sub> = 0.0819, <i>R</i> <sub>sigma</sub> = 0.0691]   |
| Data/restraints/parameters                                   | 24065/0/1163                                                                    |
| Goodness-of-fit on <i>F</i> <sup>2</sup>                     | 1.081                                                                           |
| Final <i>R</i> indexes [ <i>I</i> ≥ 2 $\sigma$ ( <i>I</i> )] | <i>R</i> <sub>1</sub> = 0.0599, <i>wR</i> <sub>2</sub> = 0.1604                 |
| Final <i>R</i> indexes [all data]                            | <i>R</i> <sub>1</sub> = 0.1117, <i>wR</i> <sub>2</sub> = 0.2009                 |
| Largest diff. peak/hole / e Å <sup>-3</sup>                  | 2.63/-0.90                                                                      |

**Determination of formula & solvent composition of CSMCRI-21 from PLATON Squeeze and Thermogravimetric analysis data:**

From the TGA plot of as-synthesized **CSMCRI-21**, the observed mass loss is 15.19 %

From PLATON Squeeze program void electron count / unit cell comes out to be 190.5

As DMF and water were used as solvents during the synthesis of the MOF, so the void space should be occupied by these lattice solvent molecules.

Now, formula of the asymmetric unit excluding guest solvents is [Co<sub>3</sub>(TCA)<sub>3</sub>(dpa)<sub>3</sub>], and mass of this asymmetric unit is 1854.4

**Table S2.** Number of electrons and molecular mass of guest molecules associated with **CSMCRI-21** for determination of solvent composition and molecular formula

|                  | Dimethyl formamide (DMF) | Water |
|------------------|--------------------------|-------|
| No. of electrons | 40                       | 10    |
| mass             | 73                       | 18    |

Considering the above mentioned number of electrons, the best possible combination of solvent molecules for **CSMCRI-21** could be  $[\text{Co}_3(\text{TCA})_3(\text{dpa})_3] \cdot 3\text{DMF} \cdot 7\text{H}_2\text{O}$

The total number of electrons contributed by lattice solvent molecules will be  $[(40 \times 3) + (10 \times 7)] = 190$ , which is in complete agreement with the PLATON result and thus validates the above formula.

The aforementioned combination was further cross-checked from TGA analysis.

Mass loss due to lattice solvents is  $[(73 \times 3) + (18 \times 7)] = 345$

Therefore, total mass of **CSMCRI-21** including lattice solvents is  $(1854.4 + 345) = 2199.4$

So mass loss due to lattice water molecules is  $[(126/2199.4) \times 100] \% = 5.72 \%$

Mass loss due to lattice DMF molecules is  $[(219/2199.4) \times 100] \% = 9.95 \%$

So total mass loss for solvents is  $(5.72 + 9.95) \% = 15.67 \%$ , which is in good agreement with that of the TGA result.

**Table S3.** Crystal data and refinement parameters for **CSMCRI-28**

|                                                |                                                    |
|------------------------------------------------|----------------------------------------------------|
| Identification code                            | <b>CSMCRI-28</b>                                   |
| Empirical formula                              | $\text{C}_{24}\text{H}_{16}\text{CoN}_4\text{O}_5$ |
| Formula weight                                 | 499.35                                             |
| Temperature/K                                  | 273.15                                             |
| Crystal system                                 | triclinic                                          |
| Space group                                    | P-1                                                |
| a/Å                                            | 9.081(4)                                           |
| b/Å                                            | 11.007(6)                                          |
| c/Å                                            | 14.835(7)                                          |
| $\alpha/^\circ$                                | 70.42(2)                                           |
| $\beta/^\circ$                                 | 84.50(2)                                           |
| $\gamma/^\circ$                                | 82.93(2)                                           |
| Volume/Å <sup>3</sup>                          | 1384.1(12)                                         |
| Z                                              | 2                                                  |
| $\rho_{\text{calc}}/\text{cm}^3$               | 1.1980                                             |
| $\mu/\text{mm}^{-1}$                           | 0.656                                              |
| F(000)                                         | 510.9                                              |
| Radiation                                      | Mo K $\alpha$ ( $\lambda = 0.71073$ )              |
| 2 $\Theta$ range for data collection/ $^\circ$ | 3.94 to 61.46                                      |

|                                         |                                                               |
|-----------------------------------------|---------------------------------------------------------------|
| Index ranges                            | $-12 \leq h \leq 13, -15 \leq k \leq 15, -21 \leq l \leq 21$  |
| Reflections collected                   | 94181                                                         |
| Independent reflections                 | 8570 [ $R_{\text{int}} = 0.0804, R_{\text{sigma}} = 0.0382$ ] |
| Data/restraints/parameters              | 8570/0/307                                                    |
| Goodness-of-fit on $F^2$                | 1.087                                                         |
| Final R indexes [ $I \geq 2\sigma(I)$ ] | $R_1 = 0.0413, wR_2 = 0.1278$                                 |
| Final R indexes [all data]              | $R_1 = 0.0603, wR_2 = 0.1509$                                 |

**Table S4.** A comparison of quenching constant, their LOD values, of various luminescent MOFs used for detection of uranyl ion

| Entry | LMOF/Coordination polymer                                  | Quenching constant ( $M^{-1}$ ) | Limit of Detection (LOD)   | References                                                       |
|-------|------------------------------------------------------------|---------------------------------|----------------------------|------------------------------------------------------------------|
| 1.    | YTU-100                                                    | $8.1 \times 10^4$               | 1.07 ppb                   | <i>ACS Appl. Mater. Interfaces</i> <b>2021</b> , 13, 51086–51094 |
| 2.    | ECUT-135                                                   | -                               | 5.4 ppb                    | <i>J. Solid State Chem.</i> <b>2021</b> , 299, 122153            |
| 3.    | $(CH_3)_2NH_2[Eu_2(BTC)(AC)_3(FM)]$                        | $8.56 \times 10^3$              | 4.12 $\mu M$               | <i>J. Mol. Struct.</i> <b>2021</b> , 1238, 130422–130431         |
| 4.    | $[Gd_2(adip)(H_2adip)(NMP)_2] \cdot DMF \cdot 3H_2O$       | $4.05 \times 10^4$              | 1.42 $\mu M$               | <i>Inorg. Chem.</i> <b>2020</b> , 59, 18027–18034                |
| 5.    | HNU-50                                                     | -                               | 0.012 $\mu M$              | <i>Inorg. Chem.</i> <b>2020</b> , 59, 9857–9865                  |
| 6.    | LnCPs                                                      | $6.19 \times 10^4$              | 1.95 $\mu M$               | <i>J. Chem. Res.</i> <b>2020</b> , 45, 130–135                   |
| 7.    | $[Eu_2(MTBC)(OH)_2(DMF)_3(H_2O)_4] \cdot 2DMF \cdot 7H_2O$ | $3.6315 \times 10^3$            | 309.2 $\mu g/L$            | <i>Talanta</i> <b>2019</b> , 196, 515–522                        |
| 8.    | $[Eu_2(TATAB)_2] \cdot 4H_2O \cdot 6DMF$                   | $4.8 \times 10^4$               | 0.9 $\mu M$                | <i>Anal. Bioanal. Chem.</i> <b>2019</b> , 411, 4213–4220         |
| 9.    | $[Tb_2(TATAB)_2] \cdot 4H_2O \cdot 6DMF$                   | -                               | 0.9 $\mu g/L$              | <i>Environ. Sci. Technol.</i> <b>2017</b> , 51, 3911–3921        |
| 10.   | $[Co(dmimpym)(nda)_2]_n$                                   | $1.1 \times 10^4$               | 13.2 $\mu M$               | <i>J. Mater. Chem. A</i> <b>2017</b> , 5, 13079–13085            |
| 11.   | $[In_2(OH)_2(H_2TTHA)(H_2O)_2]_n$                          | $4.8 \times 10^4$               | 0.42 ppm                   | <i>ACS Appl. Mater. Interfaces</i> <b>2016</b> , 8, 28718–28726  |
| 12.   | <b>CSMCRI-21</b>                                           | $4.26 \times 10^4$              | 0.13 $\mu M$ /<br>0.24 ppm | <b>This work</b>                                                 |

**Table S5.** A comparison of uptake capacities for uranium (VI) by diverse adsorbents

| Entry | Adsorbent    | pH | Adsorption capacity (mg/g) | References                                                       |
|-------|--------------|----|----------------------------|------------------------------------------------------------------|
| 1.    | i-MZIF90(50) | 7  | 1489.13                    | <i>Energy Environ. Sci.</i> <b>2022</b> , 15, 3462–3469          |
| 2.    | YTU-100      | -  | 83.43                      | <i>ACS Appl. Mater. Interfaces</i> <b>2021</b> , 13, 51086–51094 |

|     |                                                                 |     |        |                                                                     |
|-----|-----------------------------------------------------------------|-----|--------|---------------------------------------------------------------------|
| 3.  | HNU-50                                                          | 3   | 632    | <i>Inorg. Chem.</i> <b>2020</b> , 59, 9857–9865                     |
| 4.  | UCY-13                                                          | 3   | 984    | <i>J. Mater. Chem. A</i> <b>2020</b> , 8, 1849                      |
| 5.  | USC-CP-1                                                        | 5.5 | 562    | <i>Angew. Chem. Int. Ed.</i> <b>2019</b> , 58, 18808                |
| 6.  | SCU-19                                                          | 4   | 557    | <i>Angew. Chem. Int. Ed.</i> <b>2019</b> , 58, 16110–16114          |
| 7.  | JXNU-4                                                          | 4   | 129    | <i>Eur. J. Inorg. Chem.</i> <b>2019</b> , 735–739                   |
| 8.  | ECUT-100                                                        | 5   | 381    | <i>J. Solid State Chem.</i> <b>2018</b> , 266, 244–249              |
| 9.  | Azo-MOF                                                         | 5   | 200    | <i>J. Solid State Chem.</i> <b>2018</b> , 265, 148–154              |
| 10. | MOF-5                                                           | 5   | 237    | <i>Sci. Bull.</i> <b>2018</b> , 63, 831–839                         |
| 11. | ZIF-67                                                          | 4   | 1683.8 | <i>Colloids Surf. A: Physicochem. Eng.</i> <b>2018</b> , 547, 73–80 |
| 12. | Co-SLUG-35                                                      | 9   | 119    | <i>Chem. Eng. J.</i> <b>2017</b> , 316, 154–159                     |
| 13. | [Tb <sub>2</sub> (TATAB) <sub>2</sub> ]·4H <sub>2</sub> O·6 DMF | 4   | 179.08 | <i>Environ. Sci. Technol.</i> <b>2017</b> , 51, 3911–3921           |
| 14. | ZS-2                                                            | 4.5 | 58     | <i>Nat. Commun.</i> <b>2017</b> , 8, 15369                          |
| 15. | MIL-101(Cr)-traiziole-COOH                                      | 7   | 314    | <i>ACS Appl. Mater. Interfaces</i> <b>2016</b> , 8, 31032           |
| 16. | Zn(ADC)(4,4'-BPE) <sub>0.5</sub>                                | 6   | 312.32 | <i>J. Radioanal. Nucl. Chem.</i> <b>2016</b> , 310, 353–362         |
| 17. | Zn(HBTC)(L)·(H <sub>2</sub> O) <sub>2</sub>                     | 2   | 125    | <i>J. Mater. Chem. A</i> <b>2015</b> , 3, 13724–13730               |
| 18. | MOF-76                                                          | 3   | 298    | <i>Chem. Commun.</i> <b>2013</b> , 49, 10415                        |
| 19. | HKUST-1                                                         | 6   | 787.4  | <i>Colloids Surf. A: Physicochem. Eng.</i> <b>2013</b> , 431, 87–92 |
| 20. | <b>CSMCRI-21</b>                                                | 5   | 129.8  | <b>This work</b>                                                    |

**Table S6.** The distribution coefficient ( $K_d$ ) values calculated for 10 ppm solutions of diverse cations at  $V/m = 1000 \text{ mL g}^{-1}$

| Ions                          | Distribution coefficient ( $K_d$ ) ( $\times 10^3$ ) ( $\text{mL g}^{-1}$ ) | Selectivity |
|-------------------------------|-----------------------------------------------------------------------------|-------------|
| UO <sub>2</sub> <sup>2+</sup> | 49                                                                          | -           |
| Cu <sup>2+</sup>              | 0.81                                                                        | 60.4        |
| Ni <sup>2+</sup>              | 0.85                                                                        | 57.6        |
| Zn <sup>2+</sup>              | 0.72                                                                        | 68          |

|                  |      |       |
|------------------|------|-------|
| Cd <sup>2+</sup> | 0.61 | 80.3  |
| Ca <sup>2+</sup> | 0.63 | 77.7  |
| Sr <sup>2+</sup> | 0.42 | 116.6 |
| Na <sup>+</sup>  | 0.11 | 445.4 |
| K <sup>+</sup>   | 0.13 | 376.9 |

**Table S7.** A comparison of electrocatalytic performance of activated **CSMCRI-21** and **Ni<sup>2+</sup>@21a** in water oxidation to that of contemporary materials

| Entry | Material                                                        | Over-potential (mV)               | Tafel slope (mV/dec) | TOF (s <sup>-1</sup> ) | Reference                                                        |
|-------|-----------------------------------------------------------------|-----------------------------------|----------------------|------------------------|------------------------------------------------------------------|
| 1.    | Ek-a                                                            | 413 (pH 14.0)                     | 77                   | 0.004                  | <i>J. Mater. Chem. A</i> , <b>2021</b> , 9, 26800-26809          |
| 2.    | NiPc–Ni                                                         | 427 (pH 14.0)                     | 83                   | 11.32                  | <i>J. Mater. Chem. A</i> , <b>2021</b> , 9, 1623-1629            |
| 3.    | Ni-MOF/LDH                                                      | 220                               | 36                   | -                      | <i>Appl. Catal. B</i> <b>2021</b> , 286, 119906                  |
| 4.    | NiFe-HXR                                                        | 289                               | 43                   | 4.54                   | <i>ChemSusChem</i> <b>2021</b> , 14, 1830–1834                   |
| 5.    | Ni-MOF/NF                                                       | 350                               | 98                   | 0.24                   | <i>Inorg. Chem. Front.</i> <b>2021</b> , 8, 3007-3011            |
| 6.    | NiFe LDH@FeNi <sub>3</sub>                                      | 380 (pH 14.0)                     | 172                  | -                      | <i>J. Mater. Chem. A</i> , <b>2022</b> , 10, 5442-5451           |
| 7.    | Ni-MOF/NF                                                       | 362                               | 98                   | 0.024                  | <i>Inorg. Chem.</i> <b>2020</b> , 59, 4764 – 4771                |
| 8.    | Wire-like MoS <sub>2</sub> /rFeNiCo <sub>2</sub> O <sub>4</sub> | 270                               | 39                   | -                      | <i>J. Am. Chem. Soc.</i> <b>2020</b> , 142, 50–54                |
| 9.    | SCF-800                                                         | 327                               | 62                   | -                      | <i>J. Mater. Chem. A</i> <b>2020</b> , 8, 6480-6486              |
| 10.   | M-PCBN                                                          | 232                               | 32                   | -                      | <i>ACS Nano</i> <b>2020</b> , 14, 1971–1981                      |
| 11.   | Co <sub>3</sub> (HITP) <sub>2</sub>                             | 254 (pH 14.0)                     | 86.5                 | -                      | <i>Appl. Catal. B</i> , <b>2020</b> , 278, 119295.               |
| 12.   | Fe <sub>0.38</sub> Ni <sub>0.62</sub> -MOF                      | 190                               | 58.3                 | 3.65                   | <i>ACS Appl. Nano Mater.</i> <b>2019</b> , 2, 6334 – 6342        |
| 13.   | Fe <sub>2</sub> O <sub>3</sub> @Ni-MOF-74                       | 264                               | 48                   | 12.4×10 <sup>-2</sup>  | <i>Inorg. Chem.</i> <b>2019</b> , 58, 11500 – 11507              |
| 14.   | Co <sub>2</sub> -MOF@Nafion                                     | 537@5 mA/cm <sup>2</sup> (pH 7.0) | 105±5                | 0.026                  | <i>ACS Appl. Mater. Interfaces</i> <b>2019</b> , 11, 46658–46665 |
| 15.   | Ni-MOF/NF                                                       | 320                               | 123                  | 0.25                   | <i>Inorg. Chem. Front.</i> <b>2018</b> , 5, 1570-1574            |
| 16.   | Fe/Ni <sub>2.4</sub> /Co <sub>0.4</sub> -MIL-53                 | 236                               | 52.2                 | -                      | <i>Angew. Chem. Int. Ed.</i> <b>2018</b> , 57, 1888-1892         |
| 17.   | Ni-MOF@Fe-MOF                                                   | 265                               | 82                   | -                      | <i>Adv. Funct. Mater.</i> <b>2018</b> , 28, 1801554- 1801563     |



|     |                                                   |               |          |                        |                                                                  |
|-----|---------------------------------------------------|---------------|----------|------------------------|------------------------------------------------------------------|
| 18. | Co:Fe <sub>3</sub>                                | 453           | 63       | 0.088                  | <i>J. Am. Chem. Soc.</i> <b>2017</b> , 139, 5, 1778–1781         |
| 19. | ALD NiS <sub>x</sub>                              | 372           | 56       | -                      | <i>Chem. Mater.</i> <b>2016</b> , 28, 1155–1164                  |
| 20. | Co-TpBpy                                          | 400           | 59       | 0.23                   | <i>Chem. Mater.</i> <b>2016</b> , 28, 4375–4379                  |
| 21. | CoNi SUNOE                                        | 450           | 38.5     | -                      | <i>Chem. Sci.</i> <b>2015</b> , 6, 3572–3576                     |
| 22. | NG-CoSe <sub>2</sub>                              | 366           | 40       | 0.03                   | <i>ACS Nano</i> <b>2014</b> , 8, 3970–3978                       |
| 23. | Co-ZIF-9                                          | 510           | 193      | 1.76×10 <sup>-3</sup>  | <i>Nanoscale</i> <b>2014</b> , 6, 9930–9934                      |
| 24. | CSMCRI-10                                         | 396 (pH 14.0) | 102      | 0.03                   | <i>Chem. Eng. J.</i> <b>2022</b> , 429, 132301                   |
| 25. | MOF-2                                             | 370           | 101.9    | 0.6                    | <i>ACS Appl. Mater. Interfaces</i> <b>2020</b> , 12, 33679–33689 |
| 26. | NH <sub>2</sub> TA-Ni-MOF                         | 356           | 105      | 1.26×10 <sup>-2</sup>  | <i>Chem. Eur. J.</i> <b>2019</b> , 25, 11141 – 11146             |
| 27. | CoCd-MOF                                          | 353           | 110      | 3.314×10 <sup>-2</sup> | <i>ACS Appl. Mater. Interfaces</i> <b>2017</b> , 9, 37548–37553  |
| 28. | Co-WOC-1                                          | 390           | 128      | 0.05                   | <i>Angew. Chem., Int. Ed.</i> <b>2016</b> , 55, 2425–2430        |
| 29. | UTSA-16                                           | 408           | 77       | -                      | <i>ACS Appl. Mater. Interfaces</i> <b>2017</b> , 9, 7193–7201    |
| 30. | <b>CSMCRI-21</b><br>Ni <sup>2+</sup> @ <b>21a</b> | 331<br>308    | 62<br>38 | 3.45<br>12.7           | <b>This work</b>                                                 |

### CheckCIF alert explanations

#### For CSMCRI-21

PLAT910\_ALERT\_3\_B Missing # of FCF Reflection(s) Below Theta(Min). 13 Note

**Explanation:** This alert was generated due to omission of some reflections in the refinement process for technical reasons.<sup>10</sup>

#### For CSMCRI-28

PLAT919\_ALERT\_3\_B Reflection # Likely Affected by the Beamstop ... 2 Check

**Explanation:** This alert is due to large unit-cell causing reflections affected by the beamstop, which could not be rectified due to low-grade crystal quality.<sup>11</sup>

PLAT934\_ALERT\_3\_B Number of (Iobs-Icalc)/Sigma(W) > 10 Outliers .. 5 Check

**Explanation:** This alert is due to a consequence of low-grade data quality.<sup>10,12</sup>

## References

- 1) *APEX2*, v. 2014.7-1; Bruker AXS: Madison, WI, 2014.
- 2) *SAINT*, v. 8.34A; Bruker AXS: Madison, WI, 2013.
- 3) *SADABS*, v. 2014/3; Bruker AXS: Madison, WI, 2013.
- 4) O. V. Dolomanov, L. J. Bourhis, R. J. Gildea, J. A. K. Howard and H. Puschmann, OLEX2: A Complete Structure Solution, Refinement and Analysis Program, *J. Appl. Crystallogr.*, 2009, **42**, 339.
- 5) G. M. Sheldrick, *SHELXTL* Version 2014/7. <https://shelx.uniuc.gwdg.de/SHELX/index.php>.
- 6) A. L. Spek, *PLATON*; The University of Utrecht: Utrecht, The Netherlands, 1999.
- 7) <http://www.topos.ssu.samara.ru>; V. A. Blatov, IUCrCompCommNewsletter 2006, 7, 4.
- 8) S. Nandi, D. Chakraborty and R. Vaidhyanathan, Permanently Porous Single Molecule H-Bonded Organic Framework for Selective CO<sub>2</sub> Capture. *Chem. Commun.*, 2016, **52**, 7249-7252.
- 9) C. Gunathilake, J. Górka, S. Dai and M. Jaroniec, *J. Mater. Chem. A*, 2015, **3**, 11650—11659.
- 10) J. Taesch, V. Heitz, F. Topić and K. Rissanen, *Chem. Commun.*, 2012, **48**, 5118-5120.
- 11) R. Goswami, K. Karthick, S. Das, S. Rajput, N. Seal, B. Pathak, S. Kundu and S. Neogi, *ACS Appl. Mater. Interfaces*, 2022, **14**, 29773–29787.
- 12) M. Horeau, G. Lautrette, B. Wicher, V. Blot, J. Lebreton, M. Pipelier, D. Dubreuil, Y. Ferrand and I. Huc, *Angew. Chem. Int. Ed.*, 2017, **56**, 6823-6827.
